# Supplementary material for: Sheathless and high-throughput elasto-inertial bacterial sorting for enhancing molecular diagnosis of bloodstream infection
Source: Royal Society of Chemistry journal article supplement (doi:10.1039/d1lc00085c), 2021-01-01
Supplement: d1lc00085c1.pdf [file d1lc00085c1.pdf]

*Electronic Supplementary Information (ESI)*

**Sheathless and high-throughput elasto-inertial  
bacterial sorting for enhancing molecular diagnosis  
of bloodstream infection**

Xiaoguang Lu <sup>1</sup>, Joycelyn Jia Ming Chow <sup>1</sup>, Seok Hwee Koo <sup>2</sup>, Boran Jiang <sup>3</sup>, Thean Yen  
Tan <sup>3</sup>, Dahou Yang <sup>1</sup> and Ye Ai <sup>1,\*</sup>

<sup>1</sup> Pillar of Engineering Product Development, Singapore University of Technology and  
Design, Singapore 487372, Singapore

<sup>2</sup> Clinical Trials & Research Unit, Changi General Hospital, Singapore 529889, Singapore

<sup>3</sup> Department of Laboratory Medicine, Changi General Hospital, Singapore 529889,  
Singapore

\* Corresponding author. Email: [aiye@sutd.edu.sg](mailto:aiye@sutd.edu.sg); Tel: (+65) 6499 4553

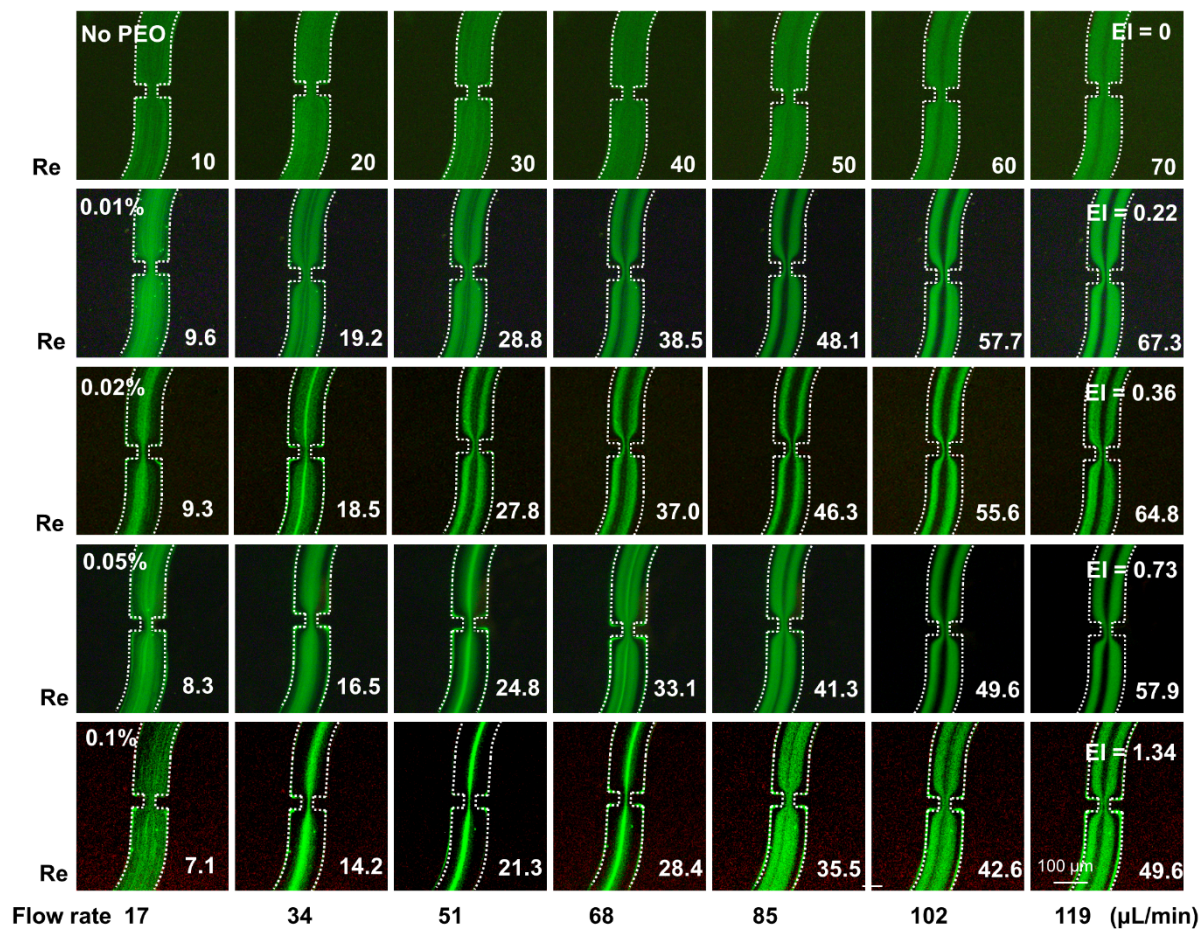

**Figure S1.** Focusing behaviors of 1  $\mu\text{m}$  particles under various viscosity of the fluid and flow rate. PEO solutions make 1  $\mu\text{m}$  particles easier to form focusing streaks compared to non-PEO solution.

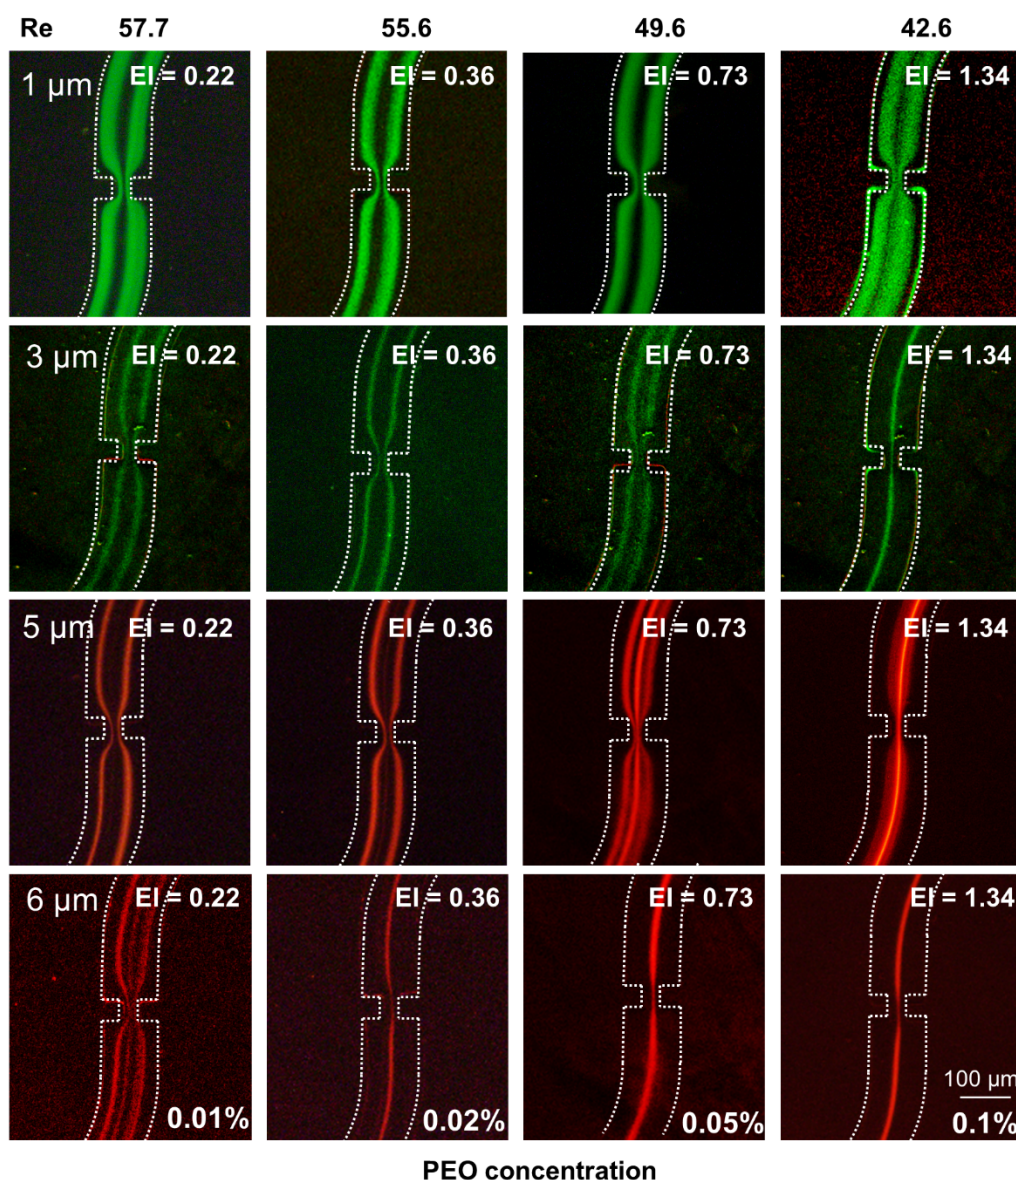

**Figure S2.** Focusing behaviors of variously sized particles in different concentrations of PEO solutions. In 0.01% of PEO solution, larger particles such as 6  $\mu\text{m}$  tend to form side-focusing profile, while in PEO solutions with 0.05% and above, except 1  $\mu\text{m}$  particles, the other particles tend to form central-focusing profile. 0.02% of PEO solution gives a proper focusing profile, which has a cut-off size between 5 and 6  $\mu\text{m}$ .



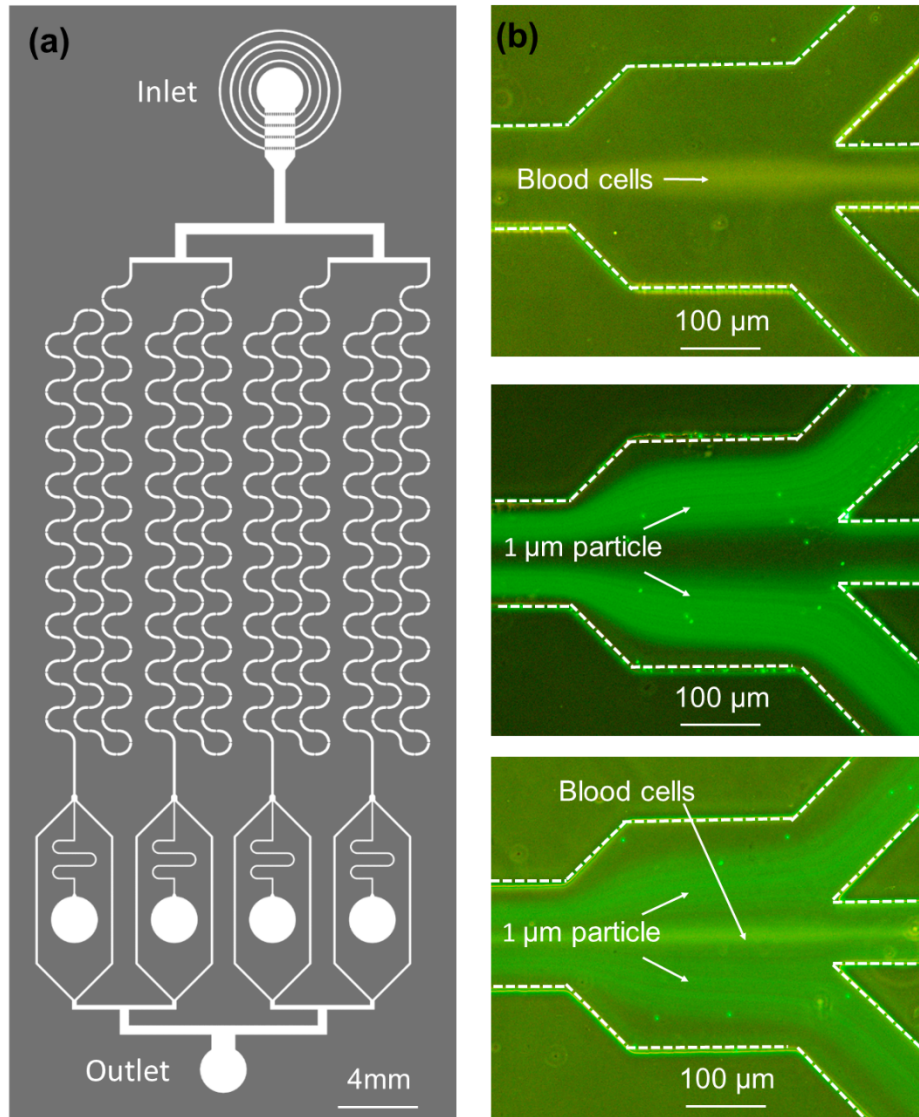

**Figure S3.** Illustration of throughput improvement by parallelization of channels. (a) CAD plot to show how four channels are parallelized into a design with one single inlet and one single outlet. (b) Fluorescence images showing parallelized channel has a good performance for 1  $\mu\text{m}$  and blood cells focusing individually and, in a mixture, respectively.
